# Supplementary material for: GBP1 inhibits osteosarcoma progression by regulating DDX17 protein stability via HSPA8
Source: Research Square preprint supplement (doi:10.21203/rs.3.rs-7033508/v1), 2025-07-23
Supplement: Supplementary file 1 [file 2e1ad4d7f49ba9fa88c37859.xlsx]

## Sheet: Sheet1
Supplementary Table S1. The PCR primer sequences.
Primers name		Sequence (5’-3’)
DDX17	Forward	GAACATCCGGAAGTAGCAAGG
	Reverse	GATCCATCAACACATCCATTACATAT
GAPDH	Forward	TGCACCACCAACTGCTTA
	Reverse	GGATGCAGGGATGATGTTC
